# Supplementary material
Source: HighWire-hosted journal article supplement (https://erj.ersjournals.com/content/54/6/1902047)
Supplement: inline-supplementary-material-1 [file inline-supplementary-material-1.pdf]

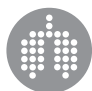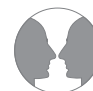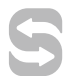

SHAREABLE PDF

# The most beautiful COPD chart in the world: all together to end COPD!

Joan B. Soriano <sup>1,2</sup>, Julio Ancochea<sup>1,2</sup> and Bartolomé R. Celli <sup>3</sup>

**Affiliations:** <sup>1</sup>Servicio de Neumología, Hospital Universitario de la Princesa, Madrid, Spain. <sup>2</sup>Centro de Investigación en Red de Enfermedades Respiratorias (CIBERES), Instituto de Salud Carlos III (ISCIII), Madrid, Spain. <sup>3</sup>Pulmonary and Critical Care Division, Brigham and Women's Hospital, and Harvard Medical School, Boston, MA, USA.

**Correspondence:** Joan B. Soriano, Hospital Universitario de la Princesa, Diego de León 62, Madrid, 28030, Spain. E-mail: jbsoriano2@gmail.com

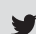

@ERSpublications

All together to end COPD! <http://bit.ly/34C7gId>

**Cite this article as:** Soriano JB, Ancochea J, Celli BR. The most beautiful COPD chart in the world: all together to end COPD!. *Eur Respir J* 2019; 54: 1902047 [<https://doi.org/10.1183/13993003.02047-2019>].

This single-page version can be shared freely online.

## To the Editor:

Since its inception in 2002, World COPD Day is celebrated to raise awareness and reduce COPD-related burden. In spite of this global effort, COPD remains poorly recognised. Indeed, BOEHM *et al.* [1], using Google Trends, noted the rather limited global awareness of COPD, which rates eighth within the top 10 causes of disease burden searched. On a positive note, they identified a seasonal trend, with a peak activity in November, that could be related to the increased incidence of acute exacerbations during the winter period, but it may also reflect the “noise” created by initiatives like the COPD Awareness Month and World COPD Day. The 2019 theme for World COPD Day is “All Together to End COPD”. Optimistically, recent evidence of projected global COPD mortality rates indicates this theme to actually be more than wishful thinking.
